# Supplementary material for: Simultaneous retrieval of water vapour, temperature and cirrus clouds properties from measurements of far infrared spectral radiance over the Antarctic Plateau
Source: Copernicus journal article supplement (doi:10.5194/amt-10-825-2017), 2017-03-08
Supplement: Supplementary file [file amt-10-825-2017-supplement-title-page.pdf › amt-10-825-2017-supplement-title-page.pdf]

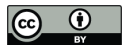

## *Supplement of*

# **Simultaneous retrieval of water vapour, temperature and cirrus clouds properties from measurements of far infrared spectral radiance over the Antarctic Plateau**

**Gianluca Di Natale et al.**

*Correspondence to:* Luca Palchetti (luca.palchetti@ino.it)

- amt-10-825-2017-supplement-title-page.pdf
- domeC-WV-clouds-retrieval-dataset-amt2017
  - 20140107-0801\_output
    - \* rPADm\_20140107\_113816\_0391\_014\_VCMapriori.dat
    - \* rPADm\_20140107\_113816\_0391\_014\_atm\_mul.dat
    - \* rPADm\_20140107\_113816\_0391\_014\_corr\_p\_mul.dat
    - \* rPADm\_20140107\_113816\_0391\_014\_cvg\_hst\_mul.dat
    - \* rPADm\_20140107\_113816\_0391\_014\_limits\_multilev.dat
    - \* rPADm\_20140107\_113816\_0391\_014\_par\_err\_T.dat
    - \* rPADm\_20140107\_113816\_0391\_014\_par\_err\_WV.dat
    - \* rPADm\_20140107\_113816\_0391\_014\_par\_out\_mul.dat
    - \* rPADm\_20140107\_113816\_0391\_014\_sigma\_p\_mul.dat
    - \* rPADm\_20140107\_113816\_0391\_014\_simulation\_mul.dat
    - \* rPADm\_20140107\_115212\_0387\_015\_VCMapriori.dat
    - \* rPADm\_20140107\_115212\_0387\_015\_atm\_mul.dat
    - \* rPADm\_20140107\_115212\_0387\_015\_corr\_p\_mul.dat
    - \* rPADm\_20140107\_115212\_0387\_015\_cvg\_hst\_mul.dat
    - \* rPADm\_20140107\_115212\_0387\_015\_limits\_multilev.dat
    - \* rPADm\_20140107\_115212\_0387\_015\_par\_err\_T.dat
    - \* rPADm\_20140107\_115212\_0387\_015\_par\_err\_WV.dat
    - \* rPADm\_20140107\_115212\_0387\_015\_par\_out\_mul.dat
    - \* rPADm\_20140107\_115212\_0387\_015\_sigma\_p\_mul.dat
    - \* rPADm\_20140107\_115212\_0387\_015\_simulation\_mul.dat
    - \* rPADm\_20140107\_120604\_0392\_016\_VCMapriori.dat
    - \* rPADm\_20140107\_120604\_0392\_016\_atm\_mul.dat
    - \* rPADm\_20140107\_120604\_0392\_016\_corr\_p\_mul.dat

- \* rPADm\_20140107\_120604\_0392\_016\_cvg\_hst\_mul.dat
- \* rPADm\_20140107\_120604\_0392\_016\_limits\_multilev.dat
- \* rPADm\_20140107\_120604\_0392\_016\_par\_err\_T.dat
- \* rPADm\_20140107\_120604\_0392\_016\_par\_err\_WV.dat
- \* rPADm\_20140107\_120604\_0392\_016\_par\_out\_mul.dat
- \* rPADm\_20140107\_120604\_0392\_016\_sigma\_p\_mul.dat
- \* rPADm\_20140107\_120604\_0392\_016\_simulation\_mul.dat
- 20140118-0700\_output
  - \* rPADm\_20140118\_113224\_0384\_018\_VCMapriori.dat
  - \* rPADm\_20140118\_113224\_0384\_018\_atm\_mul.dat
  - \* rPADm\_20140118\_113224\_0384\_018\_corr\_p\_mul.dat
  - \* rPADm\_20140118\_113224\_0384\_018\_cvg\_hst\_mul.dat
  - \* rPADm\_20140118\_113224\_0384\_018\_limits\_multilev.dat
  - \* rPADm\_20140118\_113224\_0384\_018\_par\_err\_T.dat
  - \* rPADm\_20140118\_113224\_0384\_018\_par\_err\_WV.dat
  - \* rPADm\_20140118\_113224\_0384\_018\_par\_out\_mul.dat
  - \* rPADm\_20140118\_113224\_0384\_018\_sigma\_p\_mul.dat
  - \* rPADm\_20140118\_113224\_0384\_018\_simulation\_mul.dat
  - \* rPADm\_20140118\_114607\_0383\_019\_VCMapriori.dat
  - \* rPADm\_20140118\_114607\_0383\_019\_atm\_mul.dat
  - \* rPADm\_20140118\_114607\_0383\_019\_corr\_p\_mul.dat
  - \* rPADm\_20140118\_114607\_0383\_019\_cvg\_hst\_mul.dat
  - \* rPADm\_20140118\_114607\_0383\_019\_limits\_multilev.dat
  - \* rPADm\_20140118\_114607\_0383\_019\_par\_err\_T.dat
  - \* rPADm\_20140118\_114607\_0383\_019\_par\_err\_WV.dat
  - \* rPADm\_20140118\_114607\_0383\_019\_par\_out\_mul.dat
  - \* rPADm\_20140118\_114607\_0383\_019\_sigma\_p\_mul.dat
  - \* rPADm\_20140118\_114607\_0383\_019\_simulation\_mul.dat
  - \* rPADm\_20140118\_120006\_0390\_020\_VCMapriori.dat
  - \* rPADm\_20140118\_120006\_0390\_020\_atm\_mul.dat
  - \* rPADm\_20140118\_120006\_0390\_020\_corr\_p\_mul.dat
  - \* rPADm\_20140118\_120006\_0390\_020\_cvg\_hst\_mul.dat
  - \* rPADm\_20140118\_120006\_0390\_020\_limits\_multilev.dat
  - \* rPADm\_20140118\_120006\_0390\_020\_par\_err\_T.dat
  - \* rPADm\_20140118\_120006\_0390\_020\_par\_err\_WV.dat
  - \* rPADm\_20140118\_120006\_0390\_020\_par\_out\_mul.dat
  - \* rPADm\_20140118\_120006\_0390\_020\_sigma\_p\_mul.dat
  - \* rPADm\_20140118\_120006\_0390\_020\_simulation\_mul.dat
- 20140212-0700\_output
  - \* rPADm\_20140212\_134712\_0394\_000\_VCMapriori.dat
  - \* rPADm\_20140212\_134712\_0394\_000\_atm\_mul.dat
  - \* rPADm\_20140212\_134712\_0394\_000\_corr\_p\_mul.dat
  - \* rPADm\_20140212\_134712\_0394\_000\_cvg\_hst\_mul.dat
  - \* rPADm\_20140212\_134712\_0394\_000\_limits\_multilev.dat
  - \* rPADm\_20140212\_134712\_0394\_000\_par\_err\_T.dat
  - \* rPADm\_20140212\_134712\_0394\_000\_par\_err\_WV.dat
  - \* rPADm\_20140212\_134712\_0394\_000\_par\_out\_mul.dat

- \* rPADm\_20140212\_134712\_0394\_000\_sigma\_p\_mul.dat
- \* rPADm\_20140212\_134712\_0394\_000\_simulation\_mul.dat
- \* rPADm\_20140212\_140110\_0386\_001\_VCMapriori.dat
- \* rPADm\_20140212\_140110\_0386\_001\_atm\_mul.dat
- \* rPADm\_20140212\_140110\_0386\_001\_corr\_p\_mul.dat
- \* rPADm\_20140212\_140110\_0386\_001\_cvg\_hst\_mul.dat
- \* rPADm\_20140212\_140110\_0386\_001\_limits\_multilev.dat
- \* rPADm\_20140212\_140110\_0386\_001\_par\_err\_T.dat
- \* rPADm\_20140212\_140110\_0386\_001\_par\_err\_WV.dat
- \* rPADm\_20140212\_140110\_0386\_001\_par\_out\_mul.dat
- \* rPADm\_20140212\_140110\_0386\_001\_sigma\_p\_mul.dat
- \* rPADm\_20140212\_140110\_0386\_001\_simulation\_mul.dat
- \* rPADm\_20140212\_141456\_0388\_002\_VCMapriori.dat
- \* rPADm\_20140212\_141456\_0388\_002\_atm\_mul.dat
- \* rPADm\_20140212\_141456\_0388\_002\_corr\_p\_mul.dat
- \* rPADm\_20140212\_141456\_0388\_002\_cvg\_hst\_mul.dat
- \* rPADm\_20140212\_141456\_0388\_002\_limits\_multilev.dat
- \* rPADm\_20140212\_141456\_0388\_002\_par\_err\_T.dat
- \* rPADm\_20140212\_141456\_0388\_002\_par\_err\_WV.dat
- \* rPADm\_20140212\_141456\_0388\_002\_par\_out\_mul.dat
- \* rPADm\_20140212\_141456\_0388\_002\_sigma\_p\_mul.dat
- \* rPADm\_20140212\_141456\_0388\_002\_simulation\_mul.dat

– 20140215-1210\_output

- \* rPADm\_20140215\_122955\_0394\_000\_VCMapriori.dat
- \* rPADm\_20140215\_122955\_0394\_000\_atm\_mul.dat
- \* rPADm\_20140215\_122955\_0394\_000\_corr\_p\_mul.dat
- \* rPADm\_20140215\_122955\_0394\_000\_cvg\_hst\_mul.dat
- \* rPADm\_20140215\_122955\_0394\_000\_limits\_multilev.dat
- \* rPADm\_20140215\_122955\_0394\_000\_par\_err\_T.dat
- \* rPADm\_20140215\_122955\_0394\_000\_par\_err\_WV.dat
- \* rPADm\_20140215\_122955\_0394\_000\_par\_out\_mul.dat
- \* rPADm\_20140215\_122955\_0394\_000\_sigma\_p\_mul.dat
- \* rPADm\_20140215\_122955\_0394\_000\_simulation\_mul.dat
- \* rPADm\_20140215\_124356\_0396\_001\_VCMapriori.dat
- \* rPADm\_20140215\_124356\_0396\_001\_atm\_mul.dat
- \* rPADm\_20140215\_124356\_0396\_001\_corr\_p\_mul.dat
- \* rPADm\_20140215\_124356\_0396\_001\_cvg\_hst\_mul.dat
- \* rPADm\_20140215\_124356\_0396\_001\_limits\_multilev.dat
- \* rPADm\_20140215\_124356\_0396\_001\_par\_err\_T.dat
- \* rPADm\_20140215\_124356\_0396\_001\_par\_err\_WV.dat
- \* rPADm\_20140215\_124356\_0396\_001\_par\_out\_mul.dat
- \* rPADm\_20140215\_124356\_0396\_001\_sigma\_p\_mul.dat
- \* rPADm\_20140215\_124356\_0396\_001\_simulation\_mul.dat
- \* rPADm\_20140215\_125817\_0389\_002\_VCMapriori.dat
- \* rPADm\_20140215\_125817\_0389\_002\_atm\_mul.dat
- \* rPADm\_20140215\_125817\_0389\_002\_corr\_p\_mul.dat
- \* rPADm\_20140215\_125817\_0389\_002\_cvg\_hst\_mul.dat

- \* rPADm\_20140215\_125817\_0389\_002\_limits\_multilev.dat
- \* rPADm\_20140215\_125817\_0389\_002\_par\_err\_T.dat
- \* rPADm\_20140215\_125817\_0389\_002\_par\_err\_WV.dat
- \* rPADm\_20140215\_125817\_0389\_002\_par\_out\_mul.dat
- \* rPADm\_20140215\_125817\_0389\_002\_sigma\_p\_mul.dat
- \* rPADm\_20140215\_125817\_0389\_002\_simulation\_mul.dat
- 20140402-0642\_output
  - \* rPADm\_20140402\_112256\_0385\_019\_VCMapriori.dat
  - \* rPADm\_20140402\_112256\_0385\_019\_atm\_mul.dat
  - \* rPADm\_20140402\_112256\_0385\_019\_corr\_p\_mul.dat
  - \* rPADm\_20140402\_112256\_0385\_019\_cvg\_hst\_mul.dat
  - \* rPADm\_20140402\_112256\_0385\_019\_limits\_multilev.dat
  - \* rPADm\_20140402\_112256\_0385\_019\_par\_err\_T.dat
  - \* rPADm\_20140402\_112256\_0385\_019\_par\_err\_WV.dat
  - \* rPADm\_20140402\_112256\_0385\_019\_par\_out\_mul.dat
  - \* rPADm\_20140402\_112256\_0385\_019\_sigma\_p\_mul.dat
  - \* rPADm\_20140402\_112256\_0385\_019\_simulation\_mul.dat
  - \* rPADm\_20140402\_113642\_0386\_020\_VCMapriori.dat
  - \* rPADm\_20140402\_113642\_0386\_020\_atm\_mul.dat
  - \* rPADm\_20140402\_113642\_0386\_020\_corr\_p\_mul.dat
  - \* rPADm\_20140402\_113642\_0386\_020\_cvg\_hst\_mul.dat
  - \* rPADm\_20140402\_113642\_0386\_020\_limits\_multilev.dat
  - \* rPADm\_20140402\_113642\_0386\_020\_par\_err\_T.dat
  - \* rPADm\_20140402\_113642\_0386\_020\_par\_err\_WV.dat
  - \* rPADm\_20140402\_113642\_0386\_020\_par\_out\_mul.dat
  - \* rPADm\_20140402\_113642\_0386\_020\_sigma\_p\_mul.dat
  - \* rPADm\_20140402\_113642\_0386\_020\_simulation\_mul.dat
  - \* rPADm\_20140402\_115028\_0384\_021\_VCMapriori.dat
  - \* rPADm\_20140402\_115028\_0384\_021\_atm\_mul.dat
  - \* rPADm\_20140402\_115028\_0384\_021\_corr\_p\_mul.dat
  - \* rPADm\_20140402\_115028\_0384\_021\_cvg\_hst\_mul.dat
  - \* rPADm\_20140402\_115028\_0384\_021\_limits\_multilev.dat
  - \* rPADm\_20140402\_115028\_0384\_021\_par\_err\_T.dat
  - \* rPADm\_20140402\_115028\_0384\_021\_par\_err\_WV.dat
  - \* rPADm\_20140402\_115028\_0384\_021\_par\_out\_mul.dat
  - \* rPADm\_20140402\_115028\_0384\_021\_sigma\_p\_mul.dat
  - \* rPADm\_20140402\_115028\_0384\_021\_simulation\_mul.dat
- 20140701-1030\_output
  - \* rPADm\_20140701\_113126\_0384\_003\_VCMapriori.dat
  - \* rPADm\_20140701\_113126\_0384\_003\_atm\_mul.dat
  - \* rPADm\_20140701\_113126\_0384\_003\_corr\_p\_mul.dat
  - \* rPADm\_20140701\_113126\_0384\_003\_cvg\_hst\_mul.dat
  - \* rPADm\_20140701\_113126\_0384\_003\_limits\_multilev.dat
  - \* rPADm\_20140701\_113126\_0384\_003\_par\_err\_T.dat
  - \* rPADm\_20140701\_113126\_0384\_003\_par\_err\_WV.dat
  - \* rPADm\_20140701\_113126\_0384\_003\_par\_out\_mul.dat
  - \* rPADm\_20140701\_113126\_0384\_003\_sigma\_p\_mul.dat

- \* rPADm\_20140701\_113126\_0384\_003\_simulation\_mul.dat
- \* rPADm\_20140701\_114509\_0384\_004\_VCMapriori.dat
- \* rPADm\_20140701\_114509\_0384\_004\_atm\_mul.dat
- \* rPADm\_20140701\_114509\_0384\_004\_corr\_p\_mul.dat
- \* rPADm\_20140701\_114509\_0384\_004\_cvg\_hst\_mul.dat
- \* rPADm\_20140701\_114509\_0384\_004\_limits\_multilev.dat
- \* rPADm\_20140701\_114509\_0384\_004\_par\_err\_T.dat
- \* rPADm\_20140701\_114509\_0384\_004\_par\_err\_WV.dat
- \* rPADm\_20140701\_114509\_0384\_004\_par\_out\_mul.dat
- \* rPADm\_20140701\_114509\_0384\_004\_sigma\_p\_mul.dat
- \* rPADm\_20140701\_114509\_0384\_004\_simulation\_mul.dat
- \* rPADm\_20140701\_115850\_0383\_005\_VCMapriori.dat
- \* rPADm\_20140701\_115850\_0383\_005\_atm\_mul.dat
- \* rPADm\_20140701\_115850\_0383\_005\_corr\_p\_mul.dat
- \* rPADm\_20140701\_115850\_0383\_005\_cvg\_hst\_mul.dat
- \* rPADm\_20140701\_115850\_0383\_005\_limits\_multilev.dat
- \* rPADm\_20140701\_115850\_0383\_005\_par\_err\_T.dat
- \* rPADm\_20140701\_115850\_0383\_005\_par\_err\_WV.dat
- \* rPADm\_20140701\_115850\_0383\_005\_par\_out\_mul.dat
- \* rPADm\_20140701\_115850\_0383\_005\_sigma\_p\_mul.dat
- \* rPADm\_20140701\_115850\_0383\_005\_simulation\_mul.dat
- 20140706-0801\_output
  - \* rPADm\_20140706\_125522\_0383\_020\_VCMapriori.dat
  - \* rPADm\_20140706\_125522\_0383\_020\_atm\_mul.dat
  - \* rPADm\_20140706\_125522\_0383\_020\_corr\_p\_mul.dat
  - \* rPADm\_20140706\_125522\_0383\_020\_cvg\_hst\_mul.dat
  - \* rPADm\_20140706\_125522\_0383\_020\_limits\_multilev.dat
  - \* rPADm\_20140706\_125522\_0383\_020\_par\_err\_T.dat
  - \* rPADm\_20140706\_125522\_0383\_020\_par\_err\_WV.dat
  - \* rPADm\_20140706\_125522\_0383\_020\_par\_out\_mul.dat
  - \* rPADm\_20140706\_125522\_0383\_020\_sigma\_p\_mul.dat
  - \* rPADm\_20140706\_125522\_0383\_020\_simulation\_mul.dat
  - \* rPADm\_20140706\_130901\_0383\_021\_VCMapriori.dat
  - \* rPADm\_20140706\_130901\_0383\_021\_atm\_mul.dat
  - \* rPADm\_20140706\_130901\_0383\_021\_corr\_p\_mul.dat
  - \* rPADm\_20140706\_130901\_0383\_021\_cvg\_hst\_mul.dat
  - \* rPADm\_20140706\_130901\_0383\_021\_limits\_multilev.dat
  - \* rPADm\_20140706\_130901\_0383\_021\_par\_err\_T.dat
  - \* rPADm\_20140706\_130901\_0383\_021\_par\_err\_WV.dat
  - \* rPADm\_20140706\_130901\_0383\_021\_par\_out\_mul.dat
  - \* rPADm\_20140706\_130901\_0383\_021\_sigma\_p\_mul.dat
  - \* rPADm\_20140706\_130901\_0383\_021\_simulation\_mul.dat
- 20140720-0604\_output
  - \* rPADm\_20140720\_105832\_0382\_020\_VCMapriori.dat
  - \* rPADm\_20140720\_105832\_0382\_020\_atm\_mul.dat
  - \* rPADm\_20140720\_105832\_0382\_020\_corr\_p\_mul.dat
  - \* rPADm\_20140720\_105832\_0382\_020\_cvg\_hst\_mul.dat

- \* rPADm\_20140720\_105832\_0382\_020\_limits\_multilev.dat
- \* rPADm\_20140720\_105832\_0382\_020\_par\_err\_T.dat
- \* rPADm\_20140720\_105832\_0382\_020\_par\_err\_WV.dat
- \* rPADm\_20140720\_105832\_0382\_020\_par\_out\_mul.dat
- \* rPADm\_20140720\_105832\_0382\_020\_sigma\_p\_mul.dat
- \* rPADm\_20140720\_105832\_0382\_020\_simulation\_mul.dat
- \* rPADm\_20140720\_111211\_0382\_021\_VCMapriori.dat
- \* rPADm\_20140720\_111211\_0382\_021\_atm\_mul.dat
- \* rPADm\_20140720\_111211\_0382\_021\_corr\_p\_mul.dat
- \* rPADm\_20140720\_111211\_0382\_021\_cvg\_hst\_mul.dat
- \* rPADm\_20140720\_111211\_0382\_021\_limits\_multilev.dat
- \* rPADm\_20140720\_111211\_0382\_021\_par\_err\_T.dat
- \* rPADm\_20140720\_111211\_0382\_021\_par\_err\_WV.dat
- \* rPADm\_20140720\_111211\_0382\_021\_par\_out\_mul.dat
- \* rPADm\_20140720\_111211\_0382\_021\_sigma\_p\_mul.dat
- \* rPADm\_20140720\_111211\_0382\_021\_simulation\_mul.dat
- 20140726-0759\_output
  - \* rPADm\_20140726\_113125\_0384\_014\_VCMapriori.dat
  - \* rPADm\_20140726\_113125\_0384\_014\_atm\_mul.dat
  - \* rPADm\_20140726\_113125\_0384\_014\_corr\_p\_mul.dat
  - \* rPADm\_20140726\_113125\_0384\_014\_cvg\_hst\_mul.dat
  - \* rPADm\_20140726\_113125\_0384\_014\_limits\_multilev.dat
  - \* rPADm\_20140726\_113125\_0384\_014\_par\_err\_T.dat
  - \* rPADm\_20140726\_113125\_0384\_014\_par\_err\_WV.dat
  - \* rPADm\_20140726\_113125\_0384\_014\_par\_out\_mul.dat
  - \* rPADm\_20140726\_113125\_0384\_014\_sigma\_p\_mul.dat
  - \* rPADm\_20140726\_113125\_0384\_014\_simulation\_mul.dat
  - \* rPADm\_20140726\_114507\_0389\_015\_VCMapriori.dat
  - \* rPADm\_20140726\_114507\_0389\_015\_atm\_mul.dat
  - \* rPADm\_20140726\_114507\_0389\_015\_corr\_p\_mul.dat
  - \* rPADm\_20140726\_114507\_0389\_015\_cvg\_hst\_mul.dat
  - \* rPADm\_20140726\_114507\_0389\_015\_limits\_multilev.dat
  - \* rPADm\_20140726\_114507\_0389\_015\_par\_err\_T.dat
  - \* rPADm\_20140726\_114507\_0389\_015\_par\_err\_WV.dat
  - \* rPADm\_20140726\_114507\_0389\_015\_par\_out\_mul.dat
  - \* rPADm\_20140726\_114507\_0389\_015\_sigma\_p\_mul.dat
  - \* rPADm\_20140726\_114507\_0389\_015\_simulation\_mul.dat
  - \* rPADm\_20140726\_115903\_0386\_016\_VCMapriori.dat
  - \* rPADm\_20140726\_115903\_0386\_016\_atm\_mul.dat
  - \* rPADm\_20140726\_115903\_0386\_016\_corr\_p\_mul.dat
  - \* rPADm\_20140726\_115903\_0386\_016\_cvg\_hst\_mul.dat
  - \* rPADm\_20140726\_115903\_0386\_016\_limits\_multilev.dat
  - \* rPADm\_20140726\_115903\_0386\_016\_par\_err\_T.dat
  - \* rPADm\_20140726\_115903\_0386\_016\_par\_err\_WV.dat
  - \* rPADm\_20140726\_115903\_0386\_016\_par\_out\_mul.dat
  - \* rPADm\_20140726\_115903\_0386\_016\_sigma\_p\_mul.dat
  - \* rPADm\_20140726\_115903\_0386\_016\_simulation\_mul.dat

– 20140808-0723\_output

- \* rPADm\_20140808\_113647\_0383\_017\_VCMapriori.dat
- \* rPADm\_20140808\_113647\_0383\_017\_atm\_mul.dat
- \* rPADm\_20140808\_113647\_0383\_017\_corr\_p\_mul.dat
- \* rPADm\_20140808\_113647\_0383\_017\_cvg\_hst\_mul.dat
- \* rPADm\_20140808\_113647\_0383\_017\_limits\_multilev.dat
- \* rPADm\_20140808\_113647\_0383\_017\_par\_err\_T.dat
- \* rPADm\_20140808\_113647\_0383\_017\_par\_err\_WV.dat
- \* rPADm\_20140808\_113647\_0383\_017\_par\_out\_mul.dat
- \* rPADm\_20140808\_113647\_0383\_017\_sigma\_p\_mul.dat
- \* rPADm\_20140808\_113647\_0383\_017\_simulation\_mul.dat
- \* rPADm\_20140808\_115027\_0383\_018\_VCMapriori.dat
- \* rPADm\_20140808\_115027\_0383\_018\_atm\_mul.dat
- \* rPADm\_20140808\_115027\_0383\_018\_corr\_p\_mul.dat
- \* rPADm\_20140808\_115027\_0383\_018\_cvg\_hst\_mul.dat
- \* rPADm\_20140808\_115027\_0383\_018\_limits\_multilev.dat
- \* rPADm\_20140808\_115027\_0383\_018\_par\_err\_T.dat
- \* rPADm\_20140808\_115027\_0383\_018\_par\_err\_WV.dat
- \* rPADm\_20140808\_115027\_0383\_018\_par\_out\_mul.dat
- \* rPADm\_20140808\_115027\_0383\_018\_sigma\_p\_mul.dat
- \* rPADm\_20140808\_115027\_0383\_018\_simulation\_mul.dat
- \* rPADm\_20140808\_120409\_0388\_019\_VCMapriori.dat
- \* rPADm\_20140808\_120409\_0388\_019\_atm\_mul.dat
- \* rPADm\_20140808\_120409\_0388\_019\_corr\_p\_mul.dat
- \* rPADm\_20140808\_120409\_0388\_019\_cvg\_hst\_mul.dat
- \* rPADm\_20140808\_120409\_0388\_019\_limits\_multilev.dat
- \* rPADm\_20140808\_120409\_0388\_019\_par\_err\_T.dat
- \* rPADm\_20140808\_120409\_0388\_019\_par\_err\_WV.dat
- \* rPADm\_20140808\_120409\_0388\_019\_par\_out\_mul.dat
- \* rPADm\_20140808\_120409\_0388\_019\_sigma\_p\_mul.dat
- \* rPADm\_20140808\_120409\_0388\_019\_simulation\_mul.dat

– 20140810-1218\_output

- \* rPADm\_20140810\_123803\_0396\_000\_VCMapriori.dat
- \* rPADm\_20140810\_123803\_0396\_000\_atm\_mul.dat
- \* rPADm\_20140810\_123803\_0396\_000\_corr\_p\_mul.dat
- \* rPADm\_20140810\_123803\_0396\_000\_cvg\_hst\_mul.dat
- \* rPADm\_20140810\_123803\_0396\_000\_limits\_multilev.dat
- \* rPADm\_20140810\_123803\_0396\_000\_par\_err\_T.dat
- \* rPADm\_20140810\_123803\_0396\_000\_par\_err\_WV.dat
- \* rPADm\_20140810\_123803\_0396\_000\_par\_out\_mul.dat
- \* rPADm\_20140810\_123803\_0396\_000\_sigma\_p\_mul.dat
- \* rPADm\_20140810\_123803\_0396\_000\_simulation\_mul.dat
- \* rPADm\_20140810\_125203\_0385\_001\_VCMapriori.dat
- \* rPADm\_20140810\_125203\_0385\_001\_atm\_mul.dat
- \* rPADm\_20140810\_125203\_0385\_001\_corr\_p\_mul.dat
- \* rPADm\_20140810\_125203\_0385\_001\_cvg\_hst\_mul.dat
- \* rPADm\_20140810\_125203\_0385\_001\_limits\_multilev.dat

- \* rPADm\_20140810\_125203\_0385\_001\_par\_err\_T.dat
- \* rPADm\_20140810\_125203\_0385\_001\_par\_err\_WV.dat
- \* rPADm\_20140810\_125203\_0385\_001\_par\_out\_mul.dat
- \* rPADm\_20140810\_125203\_0385\_001\_sigma\_p\_mul.dat
- \* rPADm\_20140810\_125203\_0385\_001\_simulation\_mul.dat
- \* rPADm\_20140810\_130548\_0383\_002\_VCMapriori.dat
- \* rPADm\_20140810\_130548\_0383\_002\_atm\_mul.dat
- \* rPADm\_20140810\_130548\_0383\_002\_corr\_p\_mul.dat
- \* rPADm\_20140810\_130548\_0383\_002\_cvg\_hst\_mul.dat
- \* rPADm\_20140810\_130548\_0383\_002\_limits\_multilev.dat
- \* rPADm\_20140810\_130548\_0383\_002\_par\_err\_T.dat
- \* rPADm\_20140810\_130548\_0383\_002\_par\_err\_WV.dat
- \* rPADm\_20140810\_130548\_0383\_002\_par\_out\_mul.dat
- \* rPADm\_20140810\_130548\_0383\_002\_sigma\_p\_mul.dat
- \* rPADm\_20140810\_130548\_0383\_002\_simulation\_mul.dat
- 20140811-0804\_output
  - \* rPADm\_20140811\_120328\_0383\_016\_VCMapriori.dat
  - \* rPADm\_20140811\_120328\_0383\_016\_atm\_mul.dat
  - \* rPADm\_20140811\_120328\_0383\_016\_corr\_p\_mul.dat
  - \* rPADm\_20140811\_120328\_0383\_016\_cvg\_hst\_mul.dat
  - \* rPADm\_20140811\_120328\_0383\_016\_limits\_multilev.dat
  - \* rPADm\_20140811\_120328\_0383\_016\_par\_err\_T.dat
  - \* rPADm\_20140811\_120328\_0383\_016\_par\_err\_WV.dat
  - \* rPADm\_20140811\_120328\_0383\_016\_par\_out\_mul.dat
  - \* rPADm\_20140811\_120328\_0383\_016\_sigma\_p\_mul.dat
  - \* rPADm\_20140811\_120328\_0383\_016\_simulation\_mul.dat
  - \* rPADm\_20140811\_121708\_0384\_017\_VCMapriori.dat
  - \* rPADm\_20140811\_121708\_0384\_017\_atm\_mul.dat
  - \* rPADm\_20140811\_121708\_0384\_017\_corr\_p\_mul.dat
  - \* rPADm\_20140811\_121708\_0384\_017\_cvg\_hst\_mul.dat
  - \* rPADm\_20140811\_121708\_0384\_017\_limits\_multilev.dat
  - \* rPADm\_20140811\_121708\_0384\_017\_par\_err\_T.dat
  - \* rPADm\_20140811\_121708\_0384\_017\_par\_err\_WV.dat
  - \* rPADm\_20140811\_121708\_0384\_017\_par\_out\_mul.dat
  - \* rPADm\_20140811\_121708\_0384\_017\_sigma\_p\_mul.dat
  - \* rPADm\_20140811\_121708\_0384\_017\_simulation\_mul.dat
  - \* rPADm\_20140811\_123051\_0383\_018\_VCMapriori.dat
  - \* rPADm\_20140811\_123051\_0383\_018\_atm\_mul.dat
  - \* rPADm\_20140811\_123051\_0383\_018\_corr\_p\_mul.dat
  - \* rPADm\_20140811\_123051\_0383\_018\_cvg\_hst\_mul.dat
  - \* rPADm\_20140811\_123051\_0383\_018\_limits\_multilev.dat
  - \* rPADm\_20140811\_123051\_0383\_018\_par\_err\_T.dat
  - \* rPADm\_20140811\_123051\_0383\_018\_par\_err\_WV.dat
  - \* rPADm\_20140811\_123051\_0383\_018\_par\_out\_mul.dat
  - \* rPADm\_20140811\_123051\_0383\_018\_sigma\_p\_mul.dat
  - \* rPADm\_20140811\_123051\_0383\_018\_simulation\_mul.dat
- 20140830-1243\_output



- \* rPADm\_20140830\_130232\_0388\_000\_VCMapriori.dat
- \* rPADm\_20140830\_130232\_0388\_000\_atm\_mul.dat
- \* rPADm\_20140830\_130232\_0388\_000\_corr\_p\_mul.dat
- \* rPADm\_20140830\_130232\_0388\_000\_cvg\_hst\_mul.dat
- \* rPADm\_20140830\_130232\_0388\_000\_limits\_multilev.dat
- \* rPADm\_20140830\_130232\_0388\_000\_par\_err\_T.dat
- \* rPADm\_20140830\_130232\_0388\_000\_par\_err\_WV.dat
- \* rPADm\_20140830\_130232\_0388\_000\_par\_out\_mul.dat
- \* rPADm\_20140830\_130232\_0388\_000\_sigma\_p\_mul.dat
- \* rPADm\_20140830\_130232\_0388\_000\_simulation\_mul.dat
- \* rPADm\_20140830\_131626\_0387\_001\_VCMapriori.dat
- \* rPADm\_20140830\_131626\_0387\_001\_atm\_mul.dat
- \* rPADm\_20140830\_131626\_0387\_001\_corr\_p\_mul.dat
- \* rPADm\_20140830\_131626\_0387\_001\_cvg\_hst\_mul.dat
- \* rPADm\_20140830\_131626\_0387\_001\_limits\_multilev.dat
- \* rPADm\_20140830\_131626\_0387\_001\_par\_err\_T.dat
- \* rPADm\_20140830\_131626\_0387\_001\_par\_err\_WV.dat
- \* rPADm\_20140830\_131626\_0387\_001\_par\_out\_mul.dat
- \* rPADm\_20140830\_131626\_0387\_001\_sigma\_p\_mul.dat
- \* rPADm\_20140830\_131626\_0387\_001\_simulation\_mul.dat
- \* rPADm\_20140830\_133014\_0385\_002\_VCMapriori.dat
- \* rPADm\_20140830\_133014\_0385\_002\_atm\_mul.dat
- \* rPADm\_20140830\_133014\_0385\_002\_corr\_p\_mul.dat
- \* rPADm\_20140830\_133014\_0385\_002\_cvg\_hst\_mul.dat
- \* rPADm\_20140830\_133014\_0385\_002\_limits\_multilev.dat
- \* rPADm\_20140830\_133014\_0385\_002\_par\_err\_T.dat
- \* rPADm\_20140830\_133014\_0385\_002\_par\_err\_WV.dat
- \* rPADm\_20140830\_133014\_0385\_002\_par\_out\_mul.dat
- \* rPADm\_20140830\_133014\_0385\_002\_sigma\_p\_mul.dat
- \* rPADm\_20140830\_133014\_0385\_002\_simulation\_mul.dat
- 20141001-1003\_output
  - \* rPADm\_20141001\_115925\_0384\_007\_VCMapriori.dat
  - \* rPADm\_20141001\_115925\_0384\_007\_atm\_mul.dat
  - \* rPADm\_20141001\_115925\_0384\_007\_corr\_p\_mul.dat
  - \* rPADm\_20141001\_115925\_0384\_007\_cvg\_hst\_mul.dat
  - \* rPADm\_20141001\_115925\_0384\_007\_limits\_multilev.dat
  - \* rPADm\_20141001\_115925\_0384\_007\_par\_err\_T.dat
  - \* rPADm\_20141001\_115925\_0384\_007\_par\_err\_WV.dat
  - \* rPADm\_20141001\_115925\_0384\_007\_par\_out\_mul.dat
  - \* rPADm\_20141001\_115925\_0384\_007\_sigma\_p\_mul.dat
  - \* rPADm\_20141001\_115925\_0384\_007\_simulation\_mul.dat
  - \* rPADm\_20141001\_121306\_0383\_008\_VCMapriori.dat
  - \* rPADm\_20141001\_121306\_0383\_008\_atm\_mul.dat
  - \* rPADm\_20141001\_121306\_0383\_008\_corr\_p\_mul.dat
  - \* rPADm\_20141001\_121306\_0383\_008\_cvg\_hst\_mul.dat
  - \* rPADm\_20141001\_121306\_0383\_008\_limits\_multilev.dat
  - \* rPADm\_20141001\_121306\_0383\_008\_par\_err\_T.dat

- \* rPADm\_20141001\_121306\_0383\_008\_par\_err\_WV.dat
- \* rPADm\_20141001\_121306\_0383\_008\_par\_out\_mul.dat
- \* rPADm\_20141001\_121306\_0383\_008\_sigma\_p\_mul.dat
- \* rPADm\_20141001\_121306\_0383\_008\_simulation\_mul.dat
- \* rPADm\_20141001\_122645\_0382\_009\_VCMapriori.dat
- \* rPADm\_20141001\_122645\_0382\_009\_atm\_mul.dat
- \* rPADm\_20141001\_122645\_0382\_009\_corr\_p\_mul.dat
- \* rPADm\_20141001\_122645\_0382\_009\_cvg\_hst\_mul.dat
- \* rPADm\_20141001\_122645\_0382\_009\_limits\_multilev.dat
- \* rPADm\_20141001\_122645\_0382\_009\_par\_err\_T.dat
- \* rPADm\_20141001\_122645\_0382\_009\_par\_err\_WV.dat
- \* rPADm\_20141001\_122645\_0382\_009\_par\_out\_mul.dat
- \* rPADm\_20141001\_122645\_0382\_009\_sigma\_p\_mul.dat
- \* rPADm\_20141001\_122645\_0382\_009\_simulation\_mul.dat
- 20141112-1157\_output
  - \* rPADm\_20141112\_121656\_0389\_000\_VCMapriori.dat
  - \* rPADm\_20141112\_121656\_0389\_000\_atm\_mul.dat
  - \* rPADm\_20141112\_121656\_0389\_000\_corr\_p\_mul.dat
  - \* rPADm\_20141112\_121656\_0389\_000\_cvg\_hst\_mul.dat
  - \* rPADm\_20141112\_121656\_0389\_000\_limits\_multilev.dat
  - \* rPADm\_20141112\_121656\_0389\_000\_par\_err\_T.dat
  - \* rPADm\_20141112\_121656\_0389\_000\_par\_err\_WV.dat
  - \* rPADm\_20141112\_121656\_0389\_000\_par\_out\_mul.dat
  - \* rPADm\_20141112\_121656\_0389\_000\_sigma\_p\_mul.dat
  - \* rPADm\_20141112\_121656\_0389\_000\_simulation\_mul.dat
  - \* rPADm\_20141112\_123050\_0387\_001\_VCMapriori.dat
  - \* rPADm\_20141112\_123050\_0387\_001\_atm\_mul.dat
  - \* rPADm\_20141112\_123050\_0387\_001\_corr\_p\_mul.dat
  - \* rPADm\_20141112\_123050\_0387\_001\_cvg\_hst\_mul.dat
  - \* rPADm\_20141112\_123050\_0387\_001\_limits\_multilev.dat
  - \* rPADm\_20141112\_123050\_0387\_001\_par\_err\_T.dat
  - \* rPADm\_20141112\_123050\_0387\_001\_par\_err\_WV.dat
  - \* rPADm\_20141112\_123050\_0387\_001\_par\_out\_mul.dat
  - \* rPADm\_20141112\_123050\_0387\_001\_sigma\_p\_mul.dat
  - \* rPADm\_20141112\_123050\_0387\_001\_simulation\_mul.dat
- INFO.readme
- OUTPUT\_PARAMETERS
  - \* output\_parameters.dat
- PWV
  - \* PWV\_RS.dat
  - \* PWV\_retrieved.dat
- RS
  - \* edt-20140107\_vmr.dat
  - \* edt-20140118\_vmr.dat
  - \* edt-20140212\_vmr.dat
  - \* edt-20140215\_vmr.dat

- \* edt-20140402\_vmr.dat
- \* edt-20140701\_vmr.dat
- \* edt-20140706\_vmr.dat
- \* edt-20140720\_vmr.dat
- \* edt-20140726\_vmr.dat
- \* edt-20140808\_vmr.dat
- \* edt-20140810\_vmr.dat
- \* edt-20140811\_vmr.dat
- \* edt-20140830\_vmr.dat
- \* edt-20141001\_vmr.dat
- \* edt-20141112\_vmr.dat
- clima\_VCM-profiles
  - \* VCM\_WV-T\_austral-autumn.dat
  - \* VCM\_WV-T\_austral-spring.dat
  - \* VCM\_WV-T\_austral-summer.dat
  - \* VCM\_WV-T\_austral-winter.dat
  - \* atm\_austral-autumn.dat
  - \* atm\_austral-spring.dat
  - \* atm\_austral-summer.dat
  - \* atm\_austral-winter.dat
- lidar\_profiles
  - \* cld\_profile\_140107\_12.06.dat
  - \* cld\_profile\_140118\_12.14.dat
  - \* cld\_profile\_140212\_13.47.dat
  - \* cld\_profile\_140212\_14.01.dat
  - \* cld\_profile\_140212\_14.14.dat
  - \* cld\_profile\_140215\_12.29.dat
  - \* cld\_profile\_140402\_11.50.dat
  - \* cld\_profile\_140701\_11.58.dat
  - \* cld\_profile\_140706\_13.09.dat
  - \* cld\_profile\_140720\_11.12.dat
  - \* cld\_profile\_140723\_02.30.dat
  - \* cld\_profile\_140723\_07.46.dat
  - \* cld\_profile\_140726\_12.26.dat
  - \* cld\_profile\_140808\_11.23.dat
  - \* cld\_profile\_140808\_11.50.dat
  - \* cld\_profile\_140810\_12.38.dat
  - \* cld\_profile\_140811\_12.30.dat
  - \* cld\_profile\_140830\_13.02.dat
  - \* cld\_profile\_141001\_11.59.dat
  - \* cld\_profile\_141112\_12.16.dat

The copyright of individual parts of the supplement might differ from the CC-BY 3.0 licence.
